# Supplementary material
Source: publisher figshare collection journal article supplement (https://future-science-group.figshare.com/articles/dataset/_/23574408)

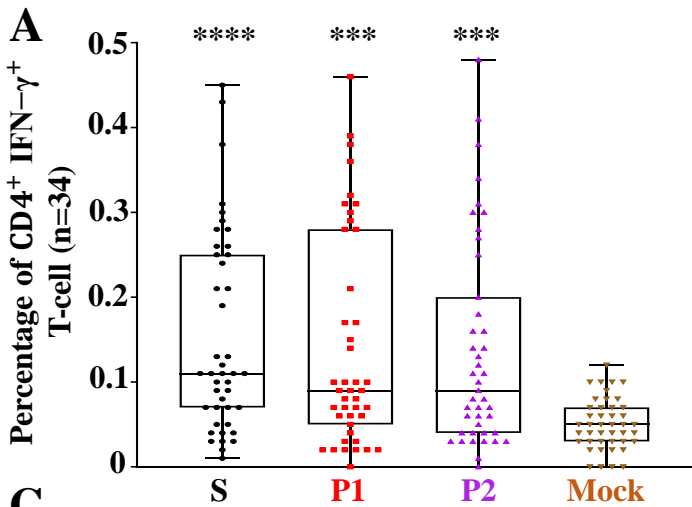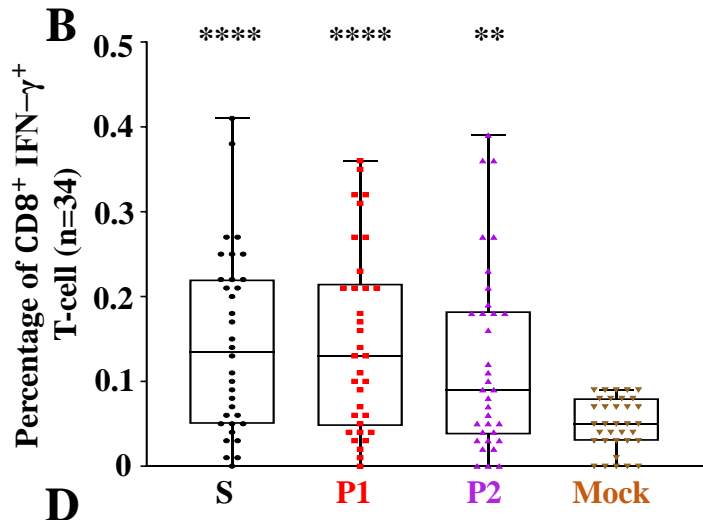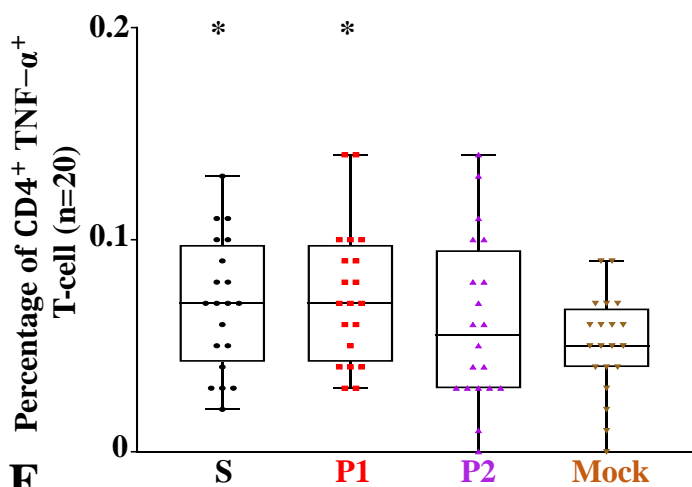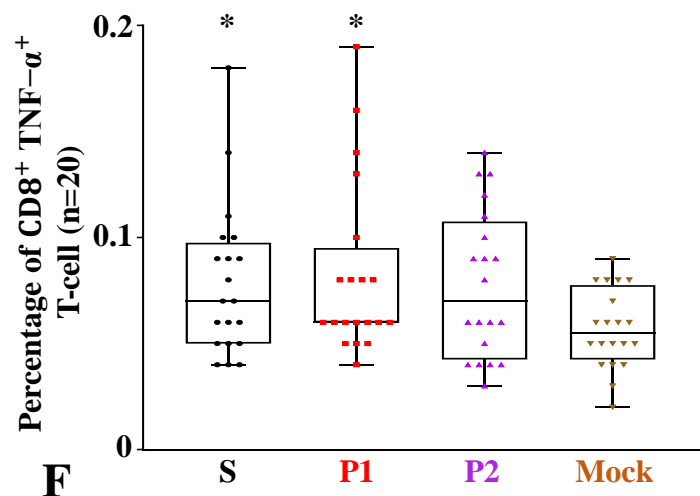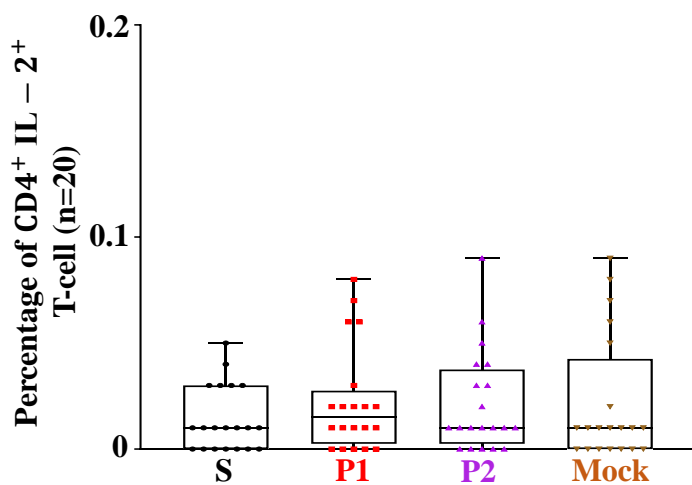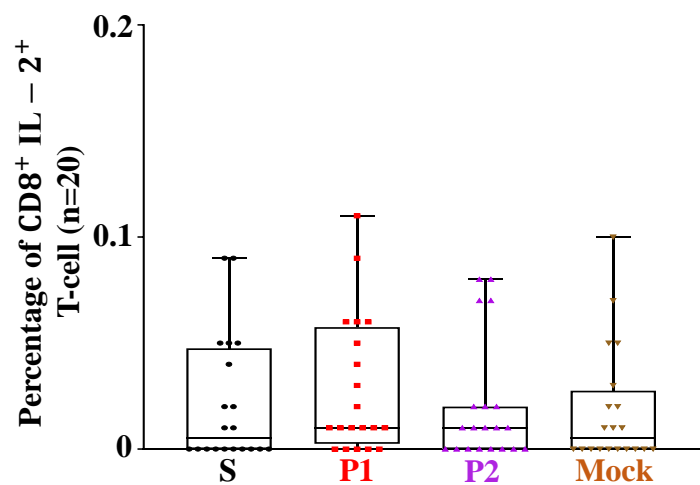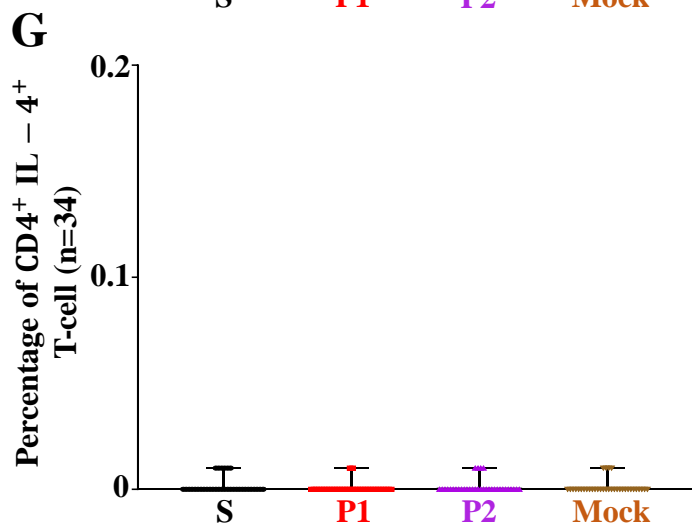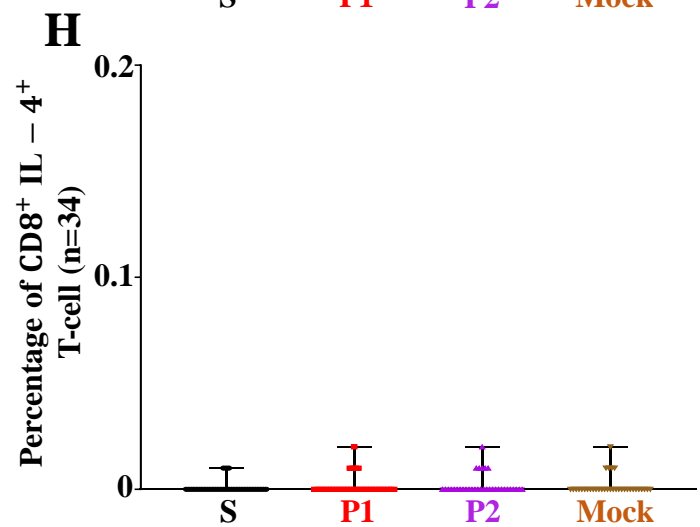

Supplement: Supplementary file [file 1]
