# Supplementary material
Source: publisher figshare collection journal article supplement (https://future-science-group.figshare.com/articles/dataset/_/23574408)
Supplement: Supplementary file [file 1]

# HLA class I

# HLA class II

**A**

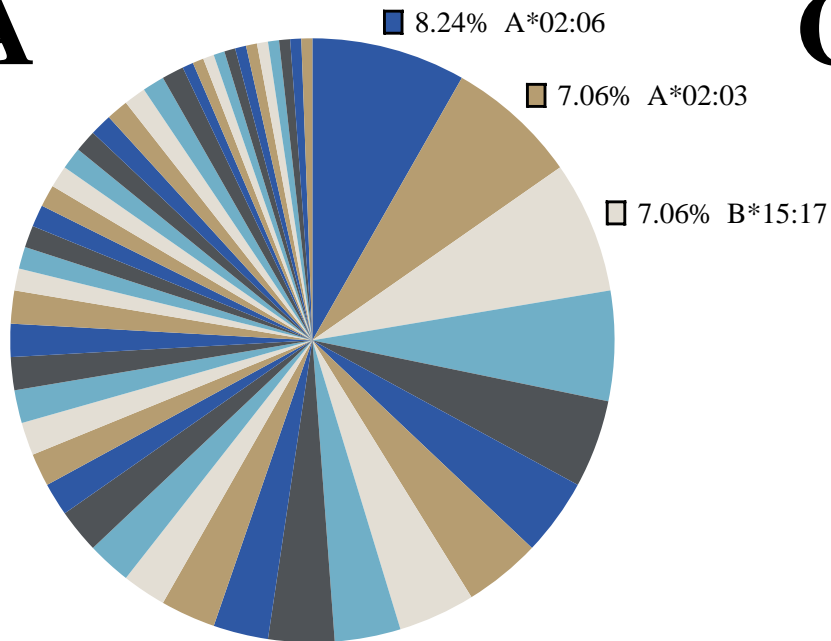

**C**

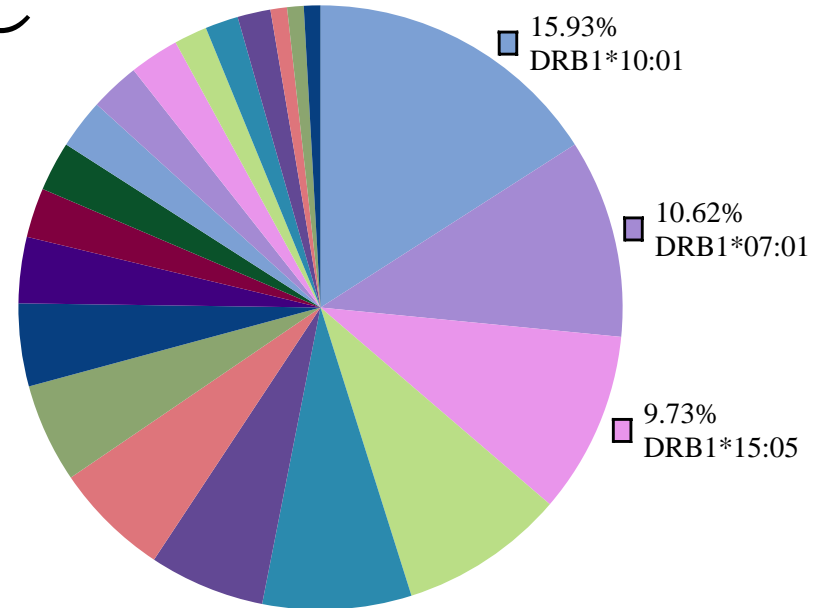

**B**

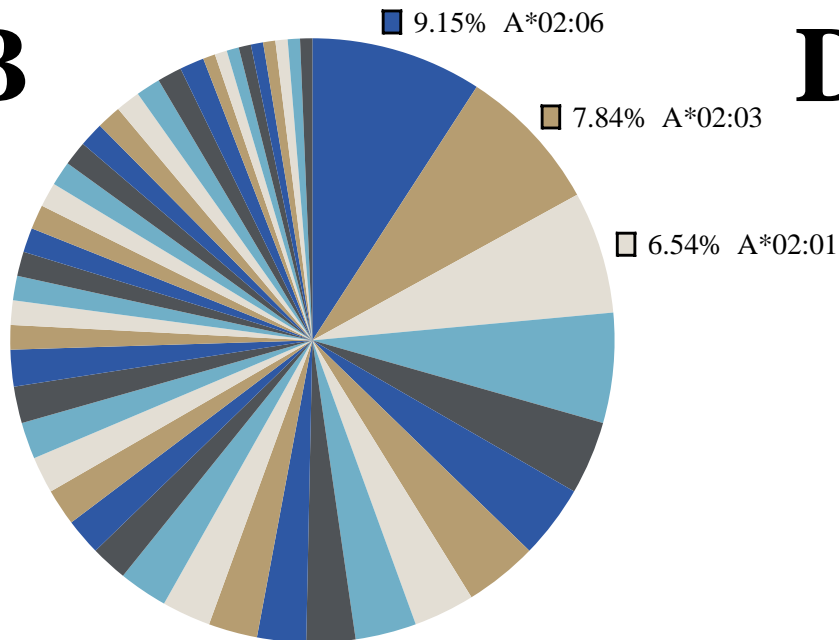

**D**

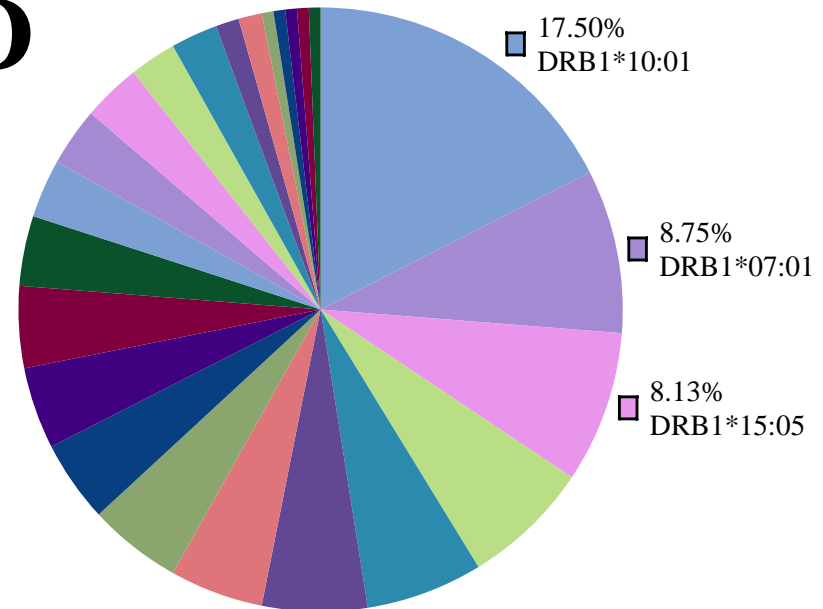

**P1**

**P2**
