# Supplementary material
Source: publisher figshare collection journal article supplement (https://future-science-group.figshare.com/articles/dataset/_/23574408)

HEK-293T

Anti-NSP5

DAPI

Merge

Mock

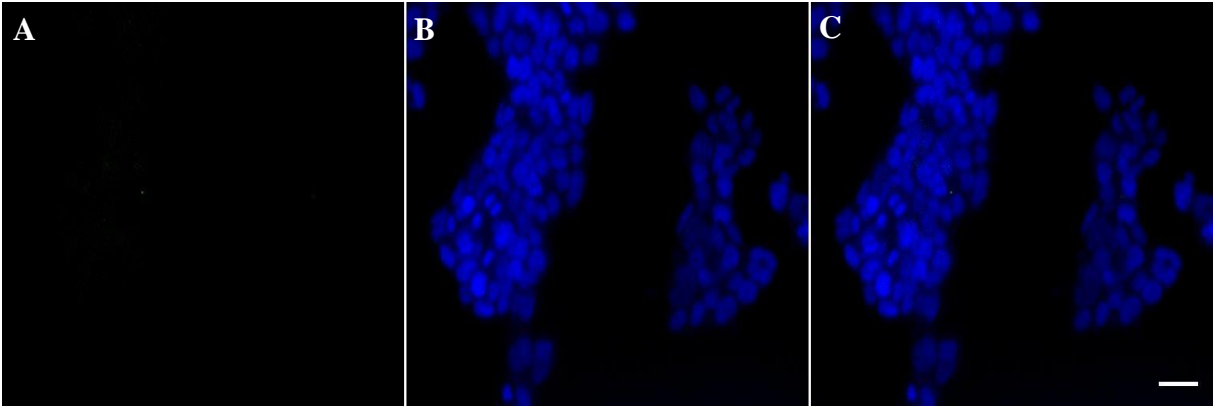

P1

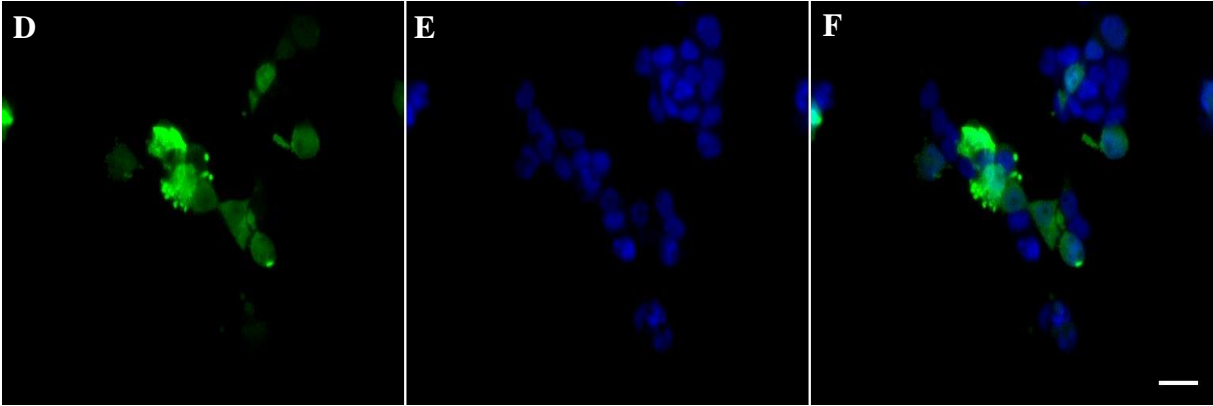

P2

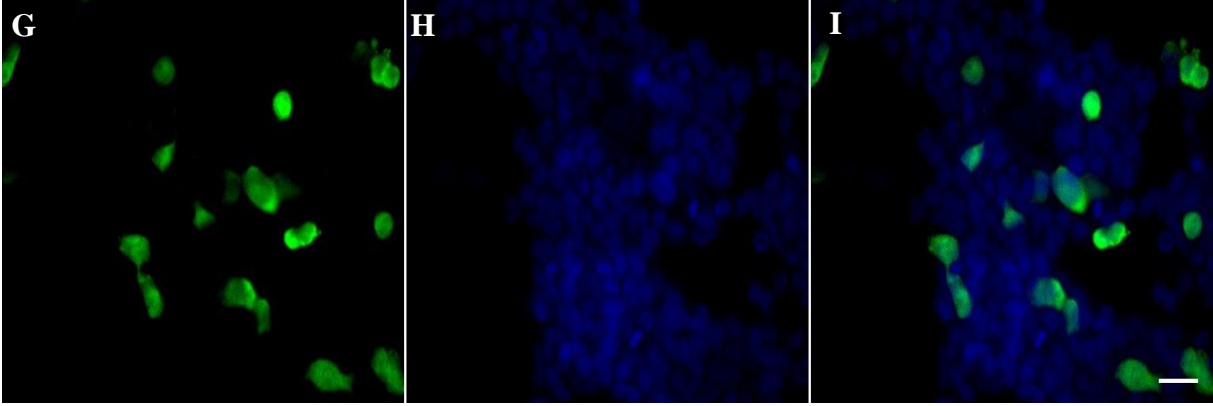

Supplement: Supplementary file [file 1]
